# Supplementary material for: Exosomes from tendon derived stem cells promote tendon repair through miR-144-3p-regulated tenocyte proliferation and migration
Source: PubMed Central journal article supplement (PMC8867681; doi:10.1186/s13287-022-02723-4), 2022-02-23

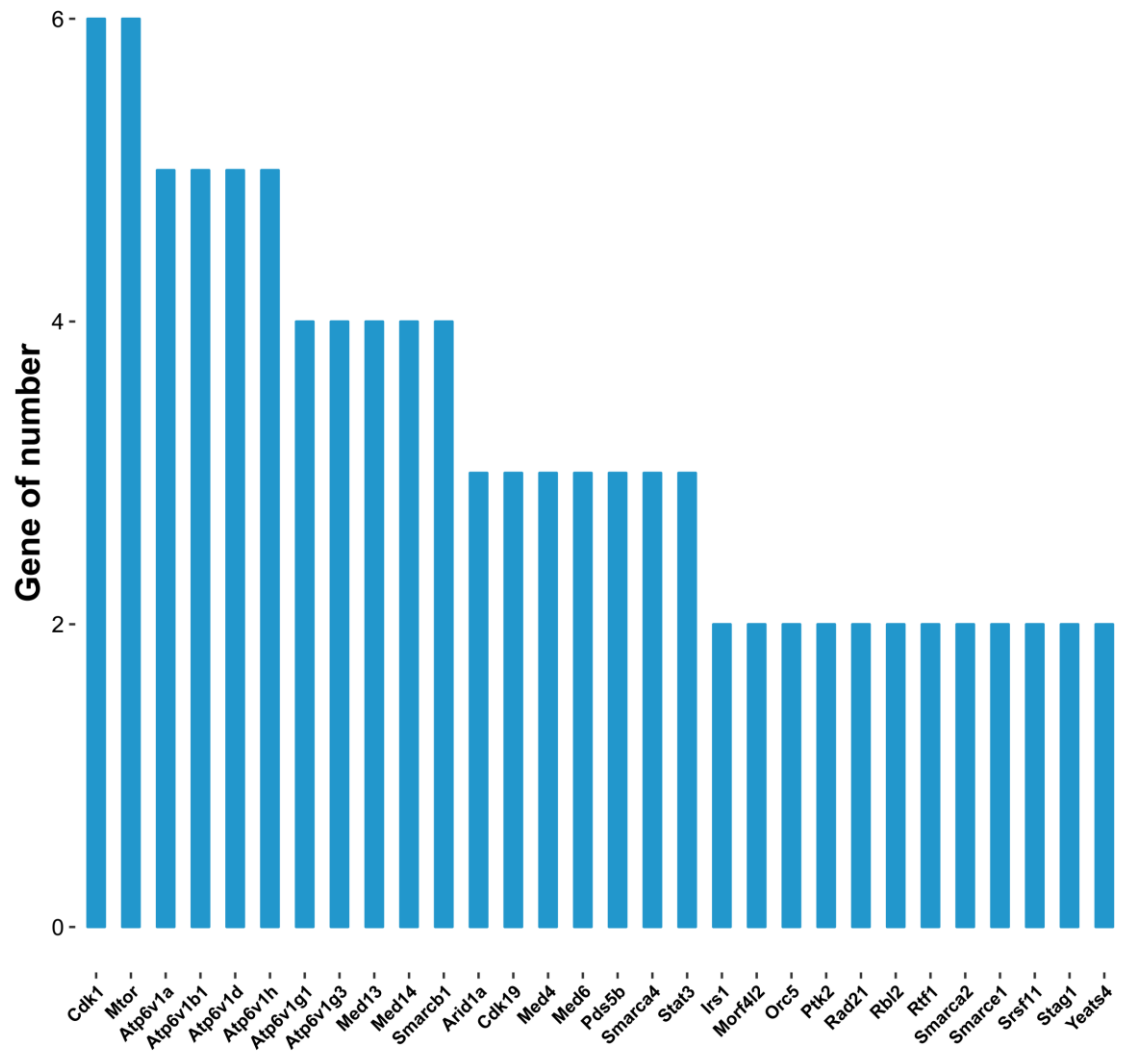

Supplement: 13287_2022_2723_MOESM3_ESM.pdf [file 13287_2022_2723_MOESM3_ESM.pdf]
